# Supplementary material for: Characterization of Extra Early Spanish Clementine Varieties (Citrus clementina Hort ex Tan) as a Relevant Source of Bioactive Compounds with Antioxidant Activity
Source: MDPI journal article supplement (doi:10.3390/foods9050642), 2020-05-16
Supplement: s1 [file s1]

## Supplemental material

**Table S1.** Tentative identification of phenolic compounds in extra early clementine varieties, *Citrus clementina* Hort ex Tan.

| Peak | Rt   | $\lambda_{\text{max}}$ | Molecular ion [M-H] <sup>-</sup> (m/z) | MS2 (m/z)                                              | Tentative identification                  |
|------|------|------------------------|----------------------------------------|--------------------------------------------------------|-------------------------------------------|
| 1    | 5.2  | 272                    | 385                                    | 281(78), 223(5),193(12),133(10)                        | Sinapoyl-glucoside1                       |
| 2    | 6.4  | 324                    | 385                                    | 367(9),209(27),191(100),173(3),147(15),129(19)         | Feruloyl-glucaric acid2                   |
| 3    | 6.8  | 266                    | 341                                    | 179(100),135(52)                                       | Caffeoyl-hexoside3                        |
| 4    | 9.1  | 274,sh328              | 355                                    | 295(2),235(4),217(13),193(28),175(100)                 | Feruloyl-6'-O-glucoside2                  |
| 5    | 9.5  | 332                    | 593                                    | 575(2),503(9),473(20),383(18),353(23)                  | Vicenin II (apigenin-6,8-di-C-glucoside)4 |
| 6    | 10.7 | 282,sh336              | 433                                    | 271(100)                                               | Naringenin-O-hexoside5                    |
| 7    | 10.9 | 284,sh338              | 443                                    | 399(3),381(4),341(2),299(14),281(15)                   | Dihydrophaseic acid glucoside             |
| 8    | 11.6 | 268                    | 281                                    | 237(95),189(29),171(100),145(12),139(19),123(54)       | Dihydrophaseic acid                       |
| 9    | 13.0 | 338                    | 623                                    | 605(3),533(5),503(31),413(11),383(22),312(8)           | Diosmetin-6,8-di-C-glucoside6             |
| 10   | 14.9 | 286,sh336              | 427                                    | 385(7),367(27),223(9),205(50),179(10),153(100),138(19) | Hydroxycinnamoyl derivative7              |
| 11   | 16.9 | 326                    | 561                                    | 367(100),337(10),193(84),191(33),173(29),134(18)       | Dihydroferulic-feruloylquinic acid dimer2 |
| 12   | 17.4 | 326                    | 561                                    | 367(100),337(8),193(92),191(29),173(26),134(14)        | Dihydroferulic-feruloylquinic acid dimer2 |
| 13   | 18.2 | 356                    | 609                                    | 301(100)                                               | Rutin (quercetin-3-O-rutinoside)8         |
| 14   | 19.8 | 280,sh334              | 579                                    | 271(100)                                               | Narirutin/naringin5                       |
| 15   | 22.5 | 284,sh340              | 609                                    | 301(100)                                               | Hesperidin/Neohesperidin9                 |
| 16   | 23.1 | 348                    | 693                                    | 633(2),595(9),507(3),395(4)                            | Nomilin-glucoside9                        |
| 17   | 30.8 | 345                    | 593                                    | 285(100)                                               | Kaempferol-O-deoxyhexosyl-hexoside10      |

Retention time (Rt), wavelengths of maximum absorption in the visible region ( $\lambda_{\text{max}}$ ), mass spectral data.

**Table S2.** Full quantification (mg/g of extract) of phenolic compounds in extra early clementine varieties, *Citrus clementina* Hort ex Tan. (mean  $\pm$  SD, n=9).

| Season                                                | 1                 |                   |                   | 2                |                  |                  | 3                |                  |                  |
|-------------------------------------------------------|-------------------|-------------------|-------------------|------------------|------------------|------------------|------------------|------------------|------------------|
| Tentative identification                              | Basol             | Clemenrubí        | Clemensoon        | Basol            | Clemenrubí       | Clemensoon       | Basol            | Clemenrubí       | Clemensoon       |
| Sinapoyl-glucoside <sup>1</sup>                       | 3.4 $\pm$ 0.2     | 2.04 $\pm$ 0.01   | 3.92 $\pm$ 0.01   | 1.09 $\pm$ 0.01  | 1.40 $\pm$ 0.04  | 0.88 $\pm$ 0.01  | 1.20 $\pm$ 0.02  | 0.93 $\pm$ 0.01  | 0.90 $\pm$ 0.01  |
| Feruloyl-glucaric acid <sup>2</sup>                   | 0.99 $\pm$ 0.01   | 1.01 $\pm$ 0.03   | 2.95 $\pm$ 0.05   | 0.49 $\pm$ 0.01  | 0.46 $\pm$ 0.03  | 0.58 $\pm$ 0.01  | 0.65 $\pm$ 0.03  | 0.62 $\pm$ 0.01  | 0.45 $\pm$ 0.02  |
| Caffeoyl-hexoside <sup>3</sup>                        | 1.56 $\pm$ 0.03   | 1.58 $\pm$ 0.07   | 3.26 $\pm$ 0.07   | 1.03 $\pm$ 0.02  | 0.90 $\pm$ 0.01  | 0.72 $\pm$ 0.01  | 1.09 $\pm$ 0.02  | 0.93 $\pm$ 0.03  | 0.85 $\pm$ 0.01  |
| Feruloyl-6'-O-glucoside <sup>2</sup>                  | 1.07 $\pm$ 0.01   | 0.68 $\pm$ 0.03   | 1.32 $\pm$ 0.05   | 0.15 $\pm$ 0.01  | 0.20 $\pm$ 0.01  | 0.19 $\pm$ 0.01  | 0.25 $\pm$ 0.01  | 0.23 $\pm$ 0.01  | 0.16 $\pm$ 0.01  |
| Vicenin II (apigenin-6,8-di-C-glucoside) <sup>4</sup> | 2.80 $\pm$ 0.01   | 0.88 $\pm$ 0.01   | 1.84 $\pm$ 0.01   | 0.42 $\pm$ 0.01  | 0.46 $\pm$ 0.01  | 0.37 $\pm$ 0.01  | 0.84 $\pm$ 0.01  | 0.69 $\pm$ 0.02  | 0.63 $\pm$ 0.01  |
| Naringenin-O-hexoside <sup>5</sup>                    | 0.80 $\pm$ 0.01   | 0.47 $\pm$ 0.02   | 1.38 $\pm$ 0.01   | 0.16 $\pm$ 0.01  | 0.17 $\pm$ 0.01  | 0.13 $\pm$ 0.01  | 0.18 $\pm$ 0.01  | 0.12 $\pm$ 0.01  | 0.09 $\pm$ 0.01  |
| Dihydrophaseic acid glucoside                         | nq                | nq                | nq                | nq               | nq               | nq               | nq               | nq               | nq               |
| Dihydrophaseic acid                                   | nq                | nq                | nq                | nq               | nq               | nq               | nq               | nq               | nq               |
| Diosmetin-6,8-di-C-glucoside <sup>6</sup>             | 0.54 $\pm$ 0.01   | 0.251 $\pm$ 0.005 | 0.50 $\pm$ 0.01   | 0.17 $\pm$ 0.01  | 0.22 $\pm$ 0.01  | 0.16 $\pm$ 0.01  | 0.20 $\pm$ 0.01  | 0.18 $\pm$ 0.01  | 0.12 $\pm$ 0.01  |
| Hydroxycinnamoyl derivative <sup>7</sup>              | 0.14 $\pm$ 0.01   | 0.099 $\pm$ 0.001 | 0.217 $\pm$ 0.001 | 0.09 $\pm$ 0.01  | 0.09 $\pm$ 0.01  | 0.04 $\pm$ 0.01  | 0.11 $\pm$ 0.01  | 0.09 $\pm$ 0.01  | 0.05 $\pm$ 0.01  |
| Dihydroferulic-feruloylquinic acid dimer <sup>2</sup> | 1.32 $\pm$ 0.03   | 0.91 $\pm$ 0.01   | 1.671 $\pm$ 0.001 | 0.25 $\pm$ 0.01  | 0.20 $\pm$ 0.02  | 0.13 $\pm$ 0.01  | 0.14 $\pm$ 0.01  | 0.16 $\pm$ 0.01  | 0.09 $\pm$ 0.01  |
| Dihydroferulic-feruloylquinic acid dimer <sup>2</sup> | 2.23 $\pm$ 0.02   | 1.223 $\pm$ 0.003 | 2.597 $\pm$ 0.004 | 0.26 $\pm$ 0.02  | 0.27 $\pm$ 0.01  | 0.13 $\pm$ 0.01  | 0.24 $\pm$ 0.01  | 0.22 $\pm$ 0.01  | 0.16 $\pm$ 0.01  |
| Rutin (quercetin-3-O-rutinoside) <sup>8</sup>         | 1.35 $\pm$ 0.01   | 0.48 $\pm$ 0.01   | 1.51 $\pm$ 0.01   | 0.23 $\pm$ 0.01  | 0.24 $\pm$ 0.01  | 0.32 $\pm$ 0.01  | 0.22 $\pm$ 0.01  | 0.36 $\pm$ 0.01  | 0.20 $\pm$ 0.01  |
| Narirutin/naringin <sup>5</sup>                       | 4.15 $\pm$ 0.01   | 2.563 $\pm$ 0.011 | 5.82 $\pm$ 0.01   | 0.80 $\pm$ 0.01  | 0.91 $\pm$ 0.01  | 0.75 $\pm$ 0.01  | 0.81 $\pm$ 0.01  | 0.76 $\pm$ 0.01  | 0.63 $\pm$ 0.01  |
| Hesperidin/Neohesperidin <sup>9</sup>                 | 4.52 $\pm$ 0.02   | 2.98 $\pm$ 0.02   | 5.25 $\pm$ 0.02   | 0.51 $\pm$ 0.01  | 0.65 $\pm$ 0.01  | 0.34 $\pm$ 0.01  | 0.59 $\pm$ 0.01  | 0.54 $\pm$ 0.01  | 0.39 $\pm$ 0.01  |
| Nomilin-glucoside <sup>9</sup>                        | 0.197 $\pm$ 0.001 | 0.056 $\pm$ 0.001 | 0.115 $\pm$ 0.001 | 0.04 $\pm$ 0.01  | 0.03 $\pm$ 0.01  | 0.04 $\pm$ 0.01  | 0.04 $\pm$ 0.01  | 0.04 $\pm$ 0.01  | 0.03 $\pm$ 0.01  |
| Kaempferol-O-deoxyhexosyl-hexoside <sup>10</sup>      | 0.25 $\pm$ 0.01   | 0.12 $\pm$ 0.01   | 0.419 $\pm$ 0.001 | 0.25 $\pm$ 0.01  | 0.18 $\pm$ 0.01  | 0.14 $\pm$ 0.01  | 0.21 $\pm$ 0.01  | 0.18 $\pm$ 0.01  | 0.20 $\pm$ 0.01  |
| <b>Total flavonoids</b>                               | 13.81 $\pm$ 0.02b | 7.33 $\pm$ 0.04c  | 15.46 $\pm$ 0.01a | 3.36 $\pm$ 0.02b | 3.53 $\pm$ 0.01a | 2.66 $\pm$ 0.01c | 3.67 $\pm$ 0.01a | 3.17 $\pm$ 0.04b | 2.66 $\pm$ 0.01c |
| <b>Total phenolic acids</b>                           | 10.51 $\pm$ 0.50b | 7.45 $\pm$ 0.21c  | 15.73 $\pm$ 0.07a | 2.58 $\pm$ 0.02b | 2.84 $\pm$ 0.02a | 2.24 $\pm$ 0.01c | 3.10 $\pm$ 0.01a | 2.86 $\pm$ 0.05b | 2.28 $\pm$ 0.02c |
| <b>Total phenolic compounds</b>                       | 25.27 $\pm$ 0.53b | 15.35 $\pm$ 0.21c | 32.78 $\pm$ 0.08a | 5.94 $\pm$ 0.01b | 6.37 $\pm$ 0.01a | 4.91 $\pm$ 0.01c | 6.78 $\pm$ 0.01a | 6.03 $\pm$ 0.09b | 4.94 $\pm$ 0.03c |

nq - not quantified. Calibration curves used: 1- sinapic acid ( $y=270.42x+62.29$ ;  $R^2=0.999$ ); 2- ferulic acid ( $y=525.36x+233.82$ ;  $R^2=0.999$ ); 3- caffeic acid ( $y=359.01x+488.40$ ;  $R^2=0.998$ ); 4- apigenin-6-C-glucoside ( $y=179.52x+116.83$ ;  $R^2=0.999$ ); 5- naringenin ( $y=539.98x+161.46$ ;  $R^2=0.995$ ); 6- luteolin-6-C-glucoside ( $y=423.95x+91.13$ ;  $R^2=0.999$ ); 7- cinnamic acid ( $y=1979x+787.15$ ;  $R^2=0.994$ ); 8- quercetin-3-O-rutinoside ( $y=280.87x+373.73$ ;  $R^2=0.998$ ); 9-hesperetin ( $y=792.22x-76.88$ ;  $R^2=0.999$ ); 10- kaempferol-3-O-rutinoside ( $y=182.94x+96.64$ ;  $R^2=0.999$ ). In each row per season different letters mean significant differences ( $p<0.05$ ).
